# Supplementary material
Source: Springer Nature journal article supplement (https://www.springermedizin.de/resource/supplementary/12879_2013_3072_MOESM2_ESM.pdf/9445832)

FR 103Hz  
7.8cm

M3

2D  
39%  
C 53  
P Off  
Gen

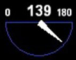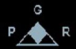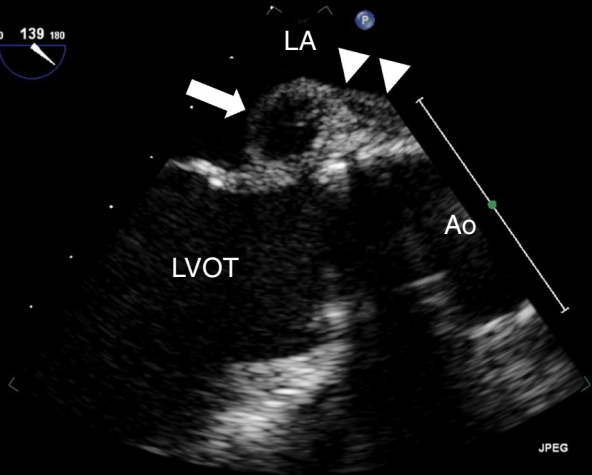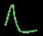

JPEG

66 bpm

Supplement: MOESM2 [file 9445832]
